# Supplementary material for: Cobalt–zinc carbides embedded in N-doped porous carbon nanospheres as polysulfide mediators for efficient lithium–sulfur batteries
Source: Royal Society of Chemistry journal article supplement (doi:10.1039/d4ra04657a), 2024-01-01
Supplement: d4ra04657a1.pdf [file d4ra04657a1.pdf]

## *Supporting information*

# **Cobalt-Zinc Carbides Embedded in N-doped Porous Carbon Nanospheres as Polysulfides Mediator for Efficient Lithium-Sulfur Batteries**

Xiangyu Tan <sup>1,‡</sup>, Jiajun Du <sup>3,‡</sup>, Haitao Wu <sup>3</sup>, Xuyu Ma <sup>2</sup>, Chunbo Zhou <sup>4</sup>, Fangrong  
Zhou <sup>1</sup>, Caijin Fan <sup>5</sup>, Xueqin Xu <sup>4</sup>, Shaocong Hou <sup>2,\*</sup> Xin Cai <sup>3,\*</sup>

<sup>1</sup> *Power Science Research Institute of Yunnan Power Grid Co., Ltd, Kunming 650214, China*

<sup>2</sup> *School of Electrical Engineering and Automation, Wuhan University, Wuhan 430072, China*

<sup>3</sup> *College of Materials and Energy, South China Agricultural University, Guangzhou 510642, China*

<sup>4</sup> *Qujing Power Supply Bureau of Yunnan Power Grid Co., Ltd, Qujing 655099, China*

<sup>5</sup> *State Key Laboratory of HVDC, Electric Power Research Institute, CSG, Guangzhou, 510080, China*

<sup>‡</sup>*Xiangyu Tan and Jiajun Du contributed equally to this work.*

*\*Corresponding author E-mail address:*

*sc.hou@whu.edu.cn (Shaocong Hou)*

*caixin2015@scau.edu.cn (Xin Cai)*

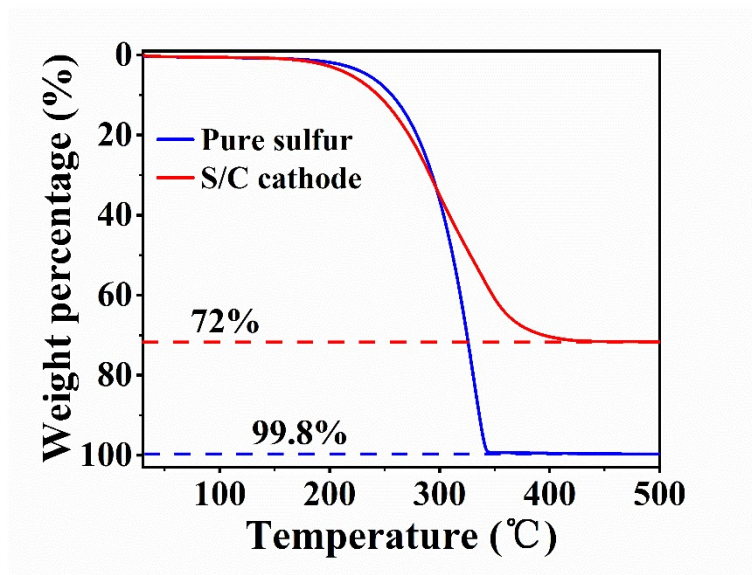

**Figure S1** Thermogravimetric curve of the sulfur/carbon (S/C) composite cathode.

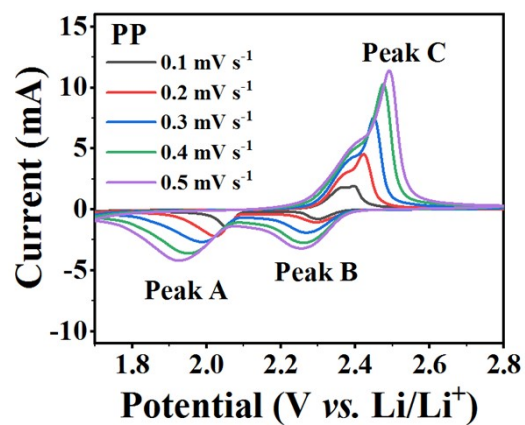

**Figure S2** CV curves of the PP battery at different scanning rates.

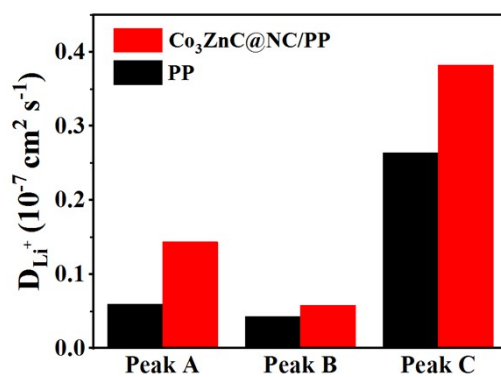

**Figure S3** Comparison of the calculated lithium ion diffusion coefficient ( $D_{\text{Li}^+}$ ) by linear fitting of the three peak currents of peaks A, B and C for the  $\text{Co}_3\text{ZnC@NC/PP}$  battery and PP battery, respectively.

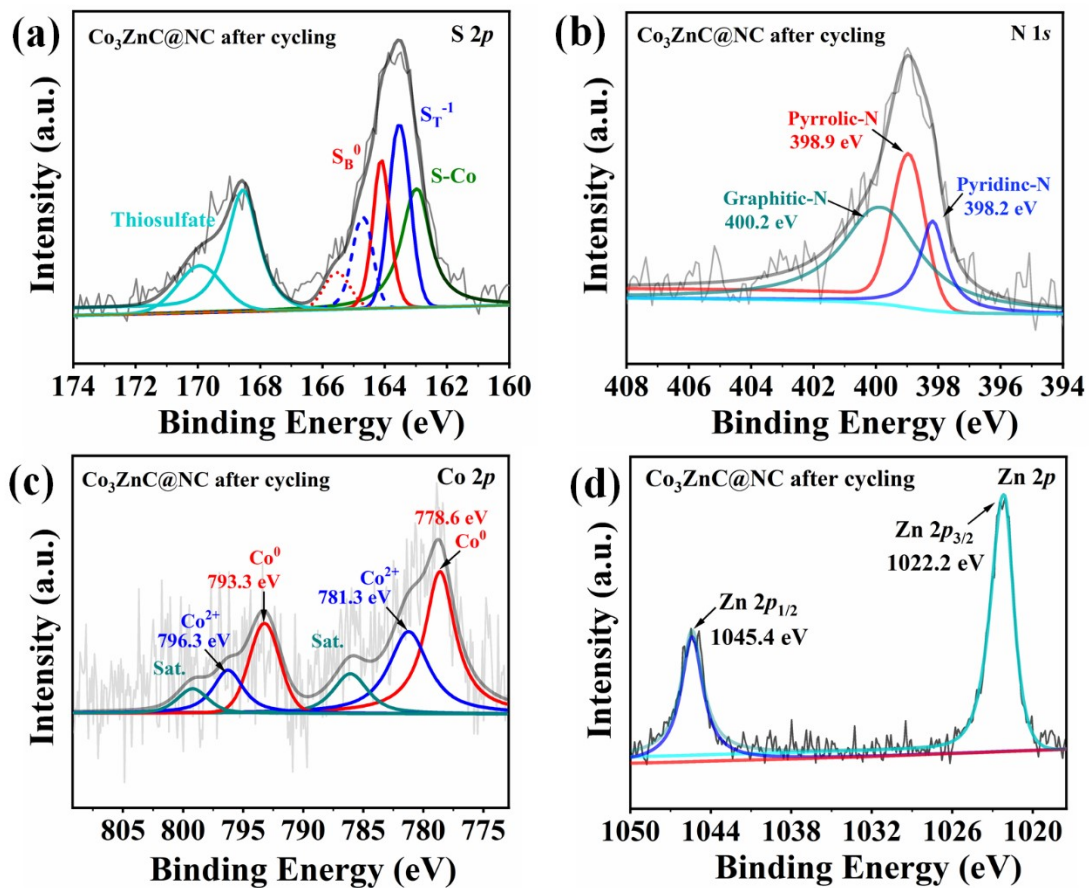

**Figure S4** XPS spectra of Co<sub>3</sub>ZnC@NC after battery cycling for 50 charge/discharge cycles at 0.5 C. (a) S 2p; (b) N 1s; (c) Co 2p; (d) Zn 2p.

**Table S1** Comparison of the electrochemical performances of Co<sub>3</sub>ZnC@NC interlayer-based Li-S batteries with recently reported composite analogues.

| Catalyst material                                           | Sulfur loading (mg cm <sup>-2</sup> ) | Initial capacity (mAh g <sup>-1</sup> )@ Current density | Cyclic capacity (mAh g <sup>-1</sup> ) @current/cycles | Rate capability (mAh g <sup>-1</sup> ) | Ref.                                                        |
|-------------------------------------------------------------|---------------------------------------|----------------------------------------------------------|--------------------------------------------------------|----------------------------------------|-------------------------------------------------------------|
| Co <sub>3</sub> ZnC@NC                                      | 1.2~1.3                               | 1659.8@0.1 C<br>1047.3@1 C                               | 695.8@1 C/250                                          | 734<br>@5 C                            | This work                                                   |
|                                                             | 6.2<br>(E/S: 6 μL mg <sup>-1</sup> )  | 1249.2@0.2 C                                             | 805.4@0.2 C/50<br>(~5 mA h cm <sup>-2</sup> )          | /                                      |                                                             |
|                                                             |                                       | 1008.7@0.5 C                                             | 542.8@0.5 C/50                                         | /                                      |                                                             |
| VN@NC                                                       | 1.2~1.3                               | 1594.8@0.1 C                                             | 712.1@1 C/500                                          | 766.5<br>@5 C                          | <i>J. Power Sources</i> <b>2023</b> ,<br>566, 2329223       |
|                                                             | 4.5<br>(E/S:8 μL mg <sup>-1</sup> )   | 934@0.2 C                                                | 811@0.2 C/70                                           | /                                      |                                                             |
| CoFe <sub>2</sub> O <sub>4</sub> /N-doped carbon nanofibers | 6.3                                   | 940@0.2 C                                                | 690@0.2 C/450                                          | /                                      | <i>Chem. Eng. J.</i> <b>2024</b> ,<br>481, 148374           |
| ZnS@CoS <sub>2</sub> nanocages                              | /                                     | 1443@0.1 C                                               | 507@2 C/650                                            | 688@3 C                                | <i>J. Energy Storage</i> <b>2024</b> ,<br>75, 109505        |
| VN QDs/NC                                                   | 3.2<br>(E/S:8.8 μL mg <sup>-1</sup> ) | 1214@0.2 C                                               | 1085@0.2 C/200<br>726@2 C/1000                         | 752@4 C                                | <i>Chem. Eng. J.</i> <b>2023</b> ,<br>459, 141526           |
| ZnCo-LDH/rGO                                                | 1.2                                   | 1365.4@0.2 C                                             | 837.7 @1 C/500                                         | 796.5@5 C                              | <i>J. Alloy. Compd.</i> , <b>2023</b> ,<br>968, 172059      |
| FeNi@NC                                                     | 1.43                                  | 1378.8@0.1 C                                             | 455@1 C/500                                            | 874@2 C                                | <i>Chem. Eng. J.</i> <b>2023</b> ,<br>474, 145751           |
|                                                             | 4.99                                  | 6.25 mA h cm <sup>-2</sup> @0.1 C                        | 4.28 mA h cm <sup>-2</sup> @0.1 C/100                  | /                                      |                                                             |
| Ni-CoSe <sub>2</sub> @NC                                    | 2.4                                   | 930.3@0.2 C                                              | 399.2@0.5 C/400                                        | 242.8@3 C                              | <i>RSC Adv.</i> , <b>2024</b> , 14,<br>15358–15364          |
| Zn-Co SA@DNC                                                | 1.5                                   | 1344@0.2 C                                               | 732@1 C/800<br>cycles                                  | 596@6 C                                | <i>J. Mater. Chem. A</i> ,<br><b>2023</b> , 11, 12025–12033 |
|                                                             | 5.4<br>(E/S:9 μL mg <sup>-1</sup> )   | /                                                        | 4.3 mA h cm <sup>-2</sup><br>@0.1 C/100                | /                                      |                                                             |
